# Supplementary material for: Solid-state emissive triarylborane-based BODIPY dyes: Photophysical properties and fluorescent sensing for fluoride and cyanide ions
Source: Royal Society of Chemistry journal article supplement (doi:10.1039/c1ob05959a), 2011-01-01

## Supporting Information

# Solid-state Emissive Triarylborane-based BODIPY Dyes: Photophysical Properties and Fluorescent Sensing for Fluoride and Cyanide Ions

Guang-Liang Fu, Hong Pan, Yi-Hong Zhao and Cui-Hua Zhao\*

*School of Chemistry and Chemical Engineering, Shandong University, Jinan 250100, People's Republic of China,*

### Table of Contents

|                                                           |    |
|-----------------------------------------------------------|----|
| Titration Measurement                                     | S2 |
| NMR Spectra of Compounds <b>1</b> , <b>2</b> and <b>4</b> | S7 |

## Titration Measurement

### Titration of **1** with TBAF

All the fluorescence experiments were recorded in a THF solution of **1** ( $c = 4.28 \times 10^{-6}$  M). The solution of **1** (2 ml in a quartz cuvette) was titrated with incremental amounts of fluoride by addition of a concentrated TBAF solution ( $c = 4.56 \times 10^{-4}$  M). In order to account for dilute effects, the TBAF solution also contained **1** at its initial concentration.

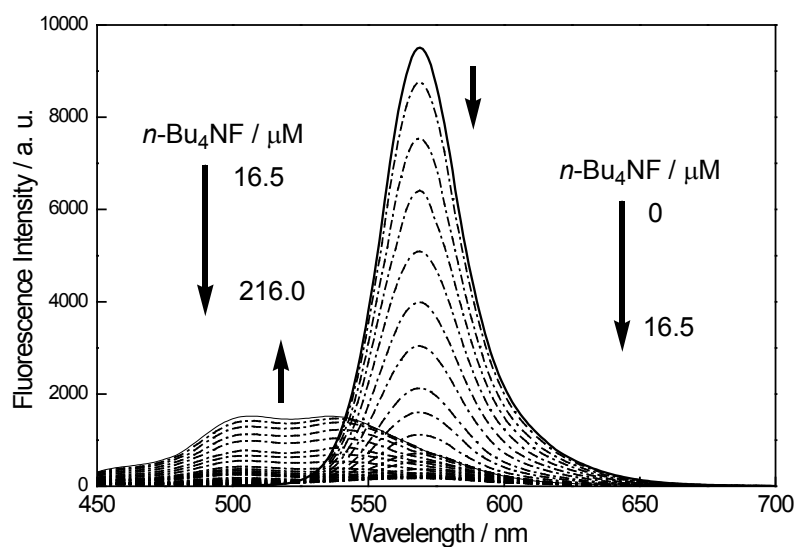

**Figure S-1** The fluorescence spectra change of **1** ( $4.28 \mu\text{M}$  in THF) upon addition of TBAF.

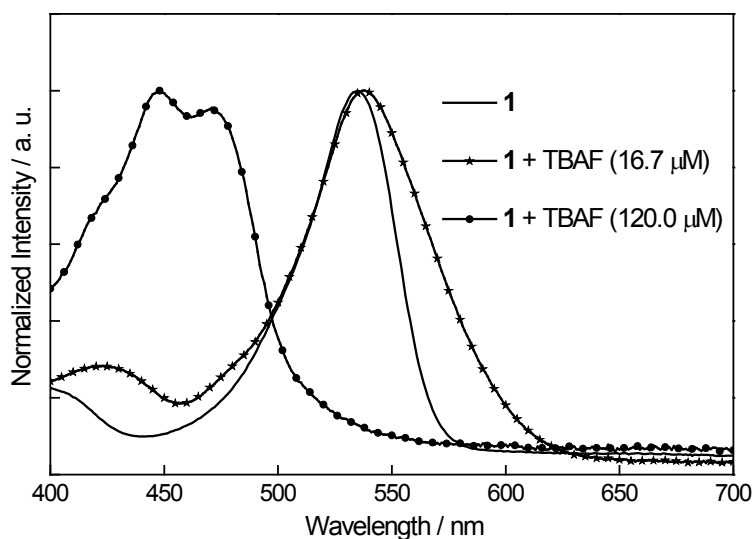

**Figure S-2** The UV/vis absorption spectra change of **1** ( $4.28 \mu\text{M}$  in THF) upon addition of TBAF.

### Titration of **2** with TBAF

All the fluorescence experiments were recorded in a THF solution of **2** ( $c = 2.61 \times 10^{-6}$  M). The solution of **2** (2 ml in a quartz cuvette) was titrated with incremental amounts of fluoride by addition of a concentrated TBAF solution ( $c = 4.63 \times 10^{-4}$  M). In order to account for dilute effects, the TBAF solution also contained **2** at its initial concentration.

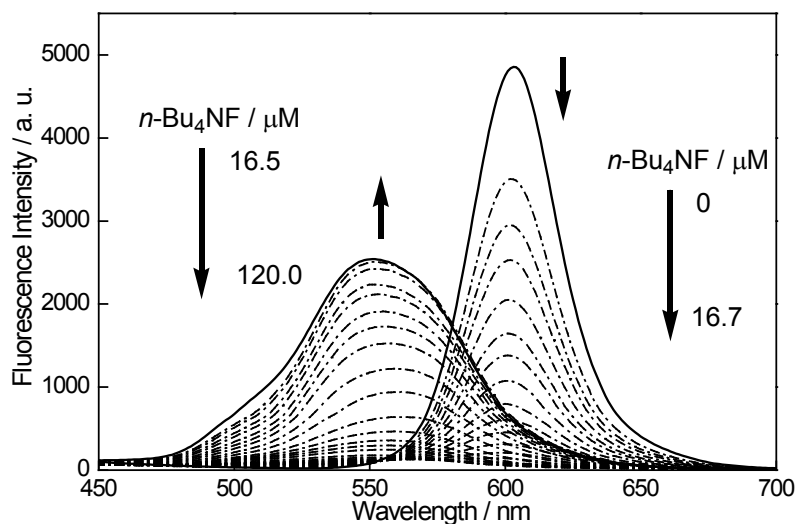

**Figure S-3** The fluorescence spectra change of **2** (2.61  $\mu$ M in THF) upon addition of TBAF.

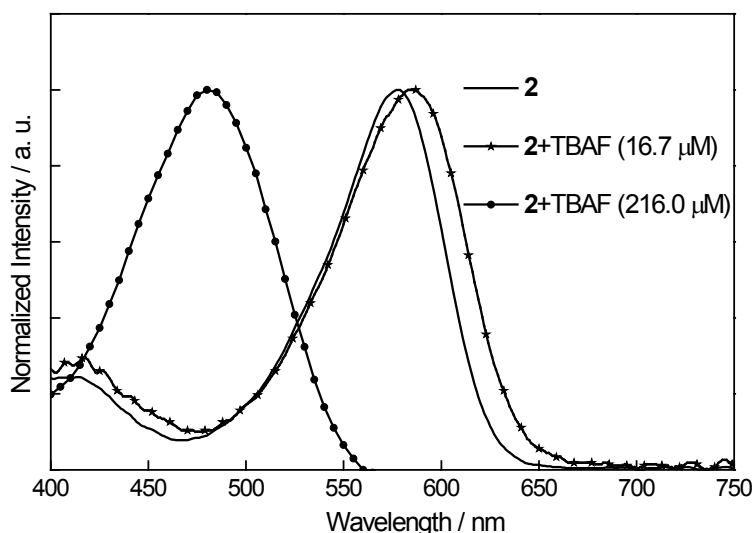

**Figure S-4.** The UV/vis absorption spectra change of **2** (2.61  $\mu$ M in THF) upon addition of TBAF.

### $^{11}\text{B}$ NMR Measurement of **1**

The  $^{11}\text{B}$  NMR spectra of a solution of **1** (0.5 mL, 0.03 M,  $\text{CDCl}_3$ ) were obtained before and after the addition of an excess of fluoride.

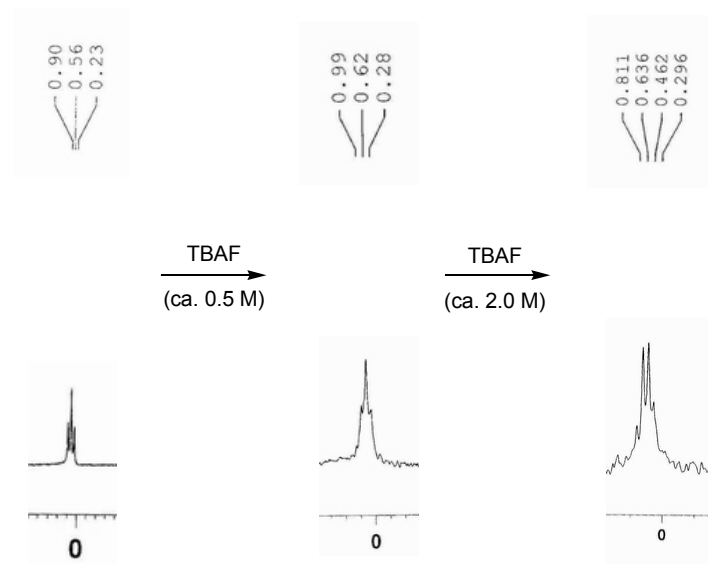

**Figure S-5.**  $^{11}\text{B}$  NMR spectra of **1** (0.03M in  $\text{CDCl}_3$ ) upon addition of TBAF.

### $^{11}\text{B}$ NMR Measurement of **2**

The  $^{11}\text{B}$  NMR spectra of a solution of **2** (0.5 mL, 0.03 M,  $\text{CDCl}_3$ ) were obtained before and after the addition of an excess of fluoride.

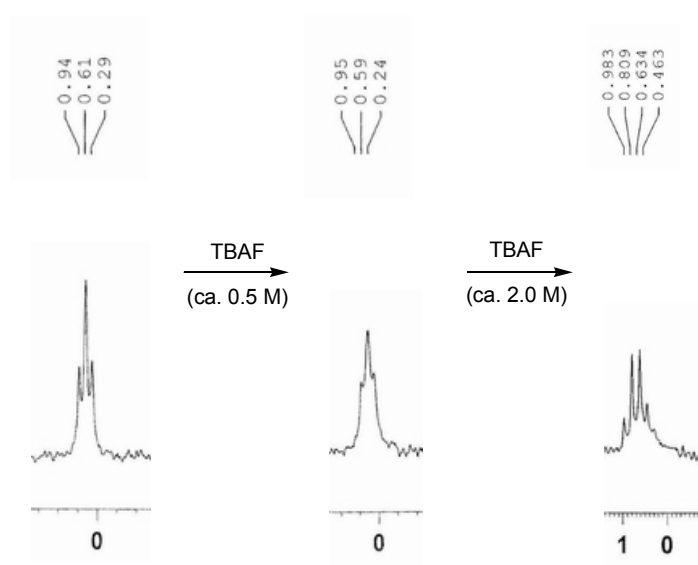

**Figure S-6.**  $^{11}\text{B}$  NMR spectra of **2** (0.03M in  $\text{CDCl}_3$ ) upon addition of TBAF.

### Titration of **1** with TBACN

All the fluorescence experiments were recorded in a THF solution of **1** ( $c = 4.28 \times 10^{-6}$  M). The solution of **1** (2 ml in a quartz cuvette) was titrated with incremental amounts of cyanide by addition of a concentrated TBACN solution ( $c = 4.28 \times 10^{-4}$  M). In order to account for dilute effects, the TBACN solution also contained **1** at its initial concentration.

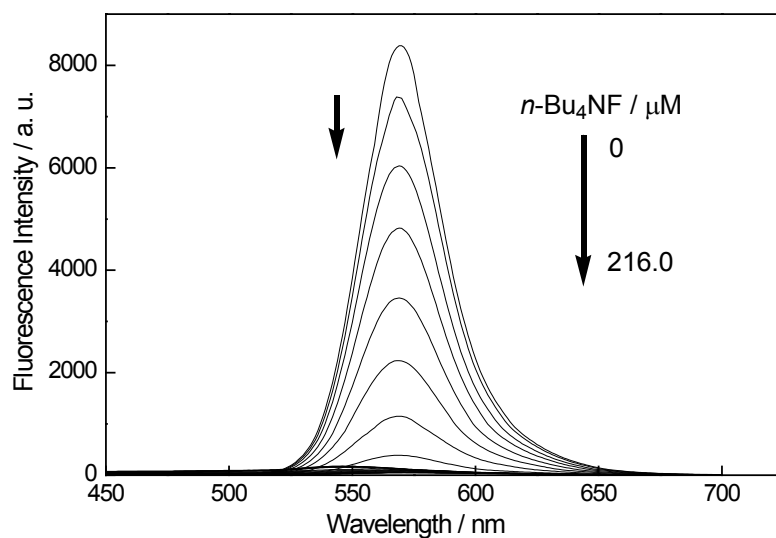

**Figure S-7.** Fluorescence spectra change of (a) **1** ( $4.28 \mu\text{M}$  in THF,  $\lambda_{\text{ex}} = 370 \text{ nm}$ ) upon addition of TBACN.

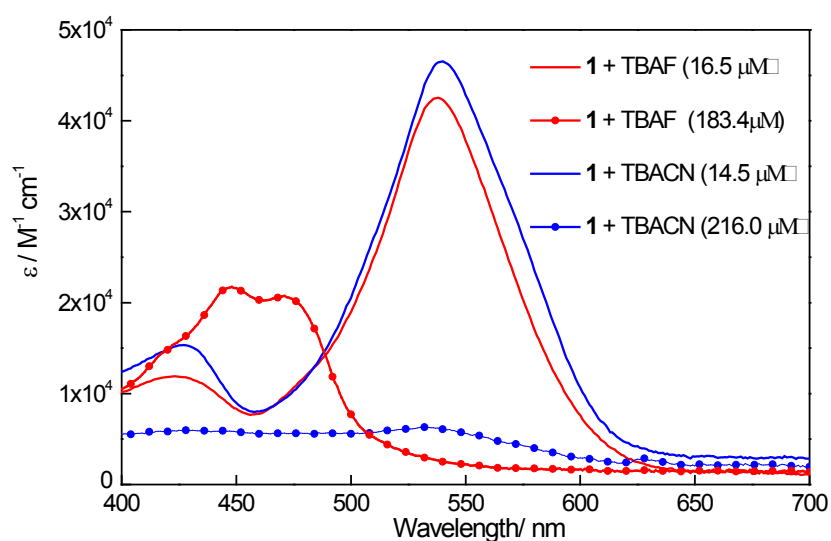

**Figure S-8.** The UV/vis absorption spectra of **1** in THF ( $4.28 \mu\text{M}$ ) after addition of excess TBAF and TBACN.

### Titration of **2** with TBACN

All the fluorescence experiments were recorded in a THF solution of **1** ( $c = 2.61 \times 10^{-6}$  M). The solution of **2** (2 ml in a quartz cuvette) was titrated with incremental amounts of cyanide by addition of a concentrated TBACN solution ( $c = 5.21 \times 10^{-4}$  M). In order to account for dilute effects, the TBACN solution also contained **2** at its initial concentration.

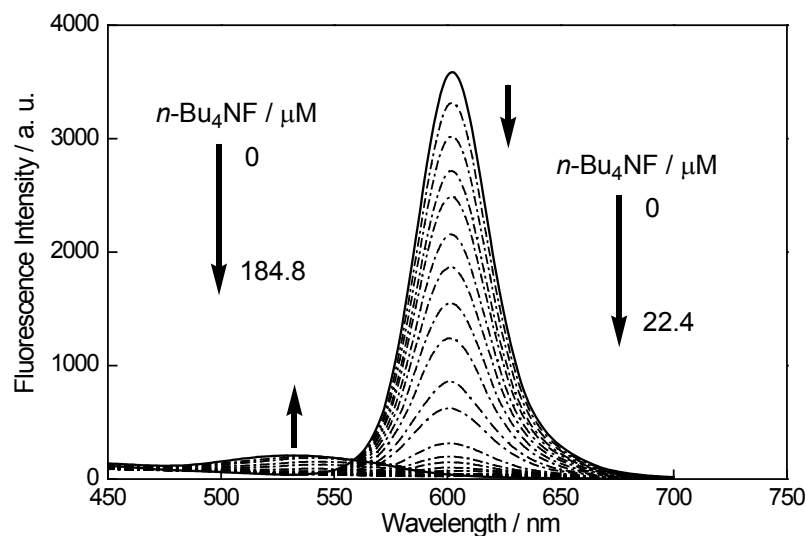

**Figure S-9.** Fluorescence spectra change of (a) **2** ( $2.61 \mu\text{M}$  in THF,  $\lambda_{\text{ex}} = 370 \text{ nm}$ ) upon addition of TBACN.

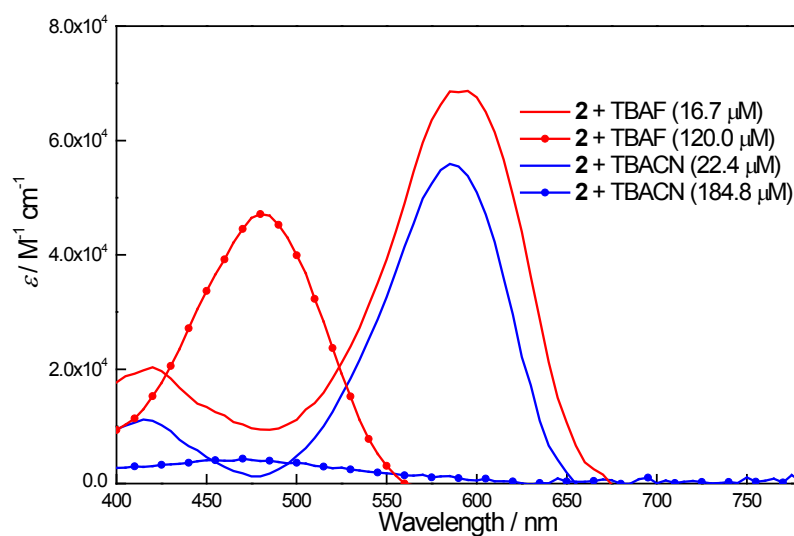

**Figure S-10.** The UV/vis absorption spectra of **2** in THF ( $2.61 \mu\text{M}$ ) after addition of excess TBAF and TBACN.

## NMR Spectra

$^1\text{H}$  NMR of **4** (300 MHz,  $\text{CDCl}_3$ )

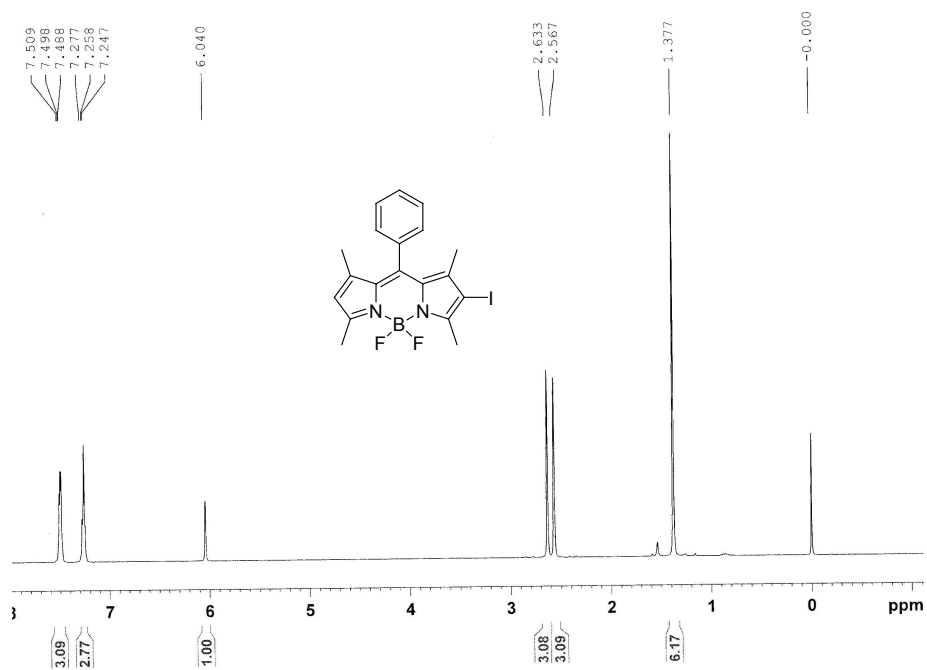

$^{13}\text{C}$  NMR of **4** (400 MHz,  $\text{CDCl}_3$ )

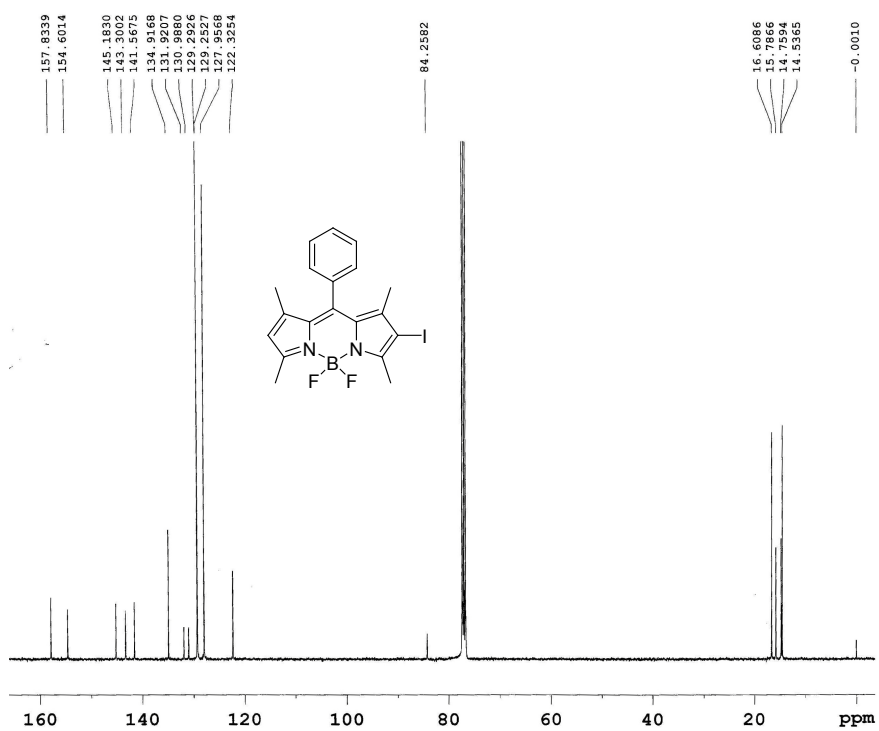

<sup>1</sup>H NMR of **1** (300 MHz, CDCl<sub>3</sub>)

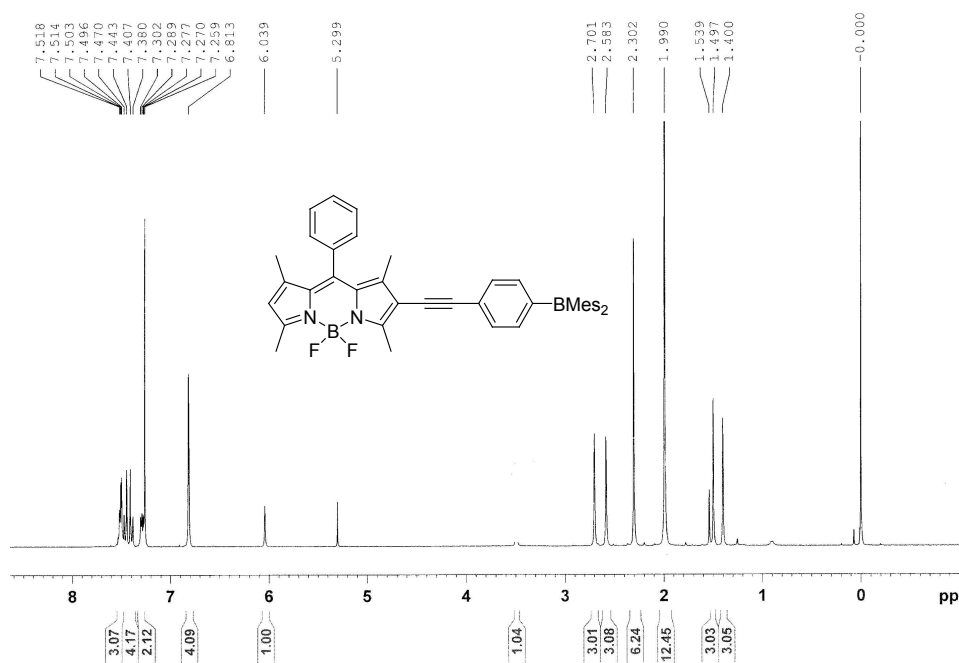

<sup>13</sup>C NMR of **1** (400 MHz, CDCl<sub>3</sub>)

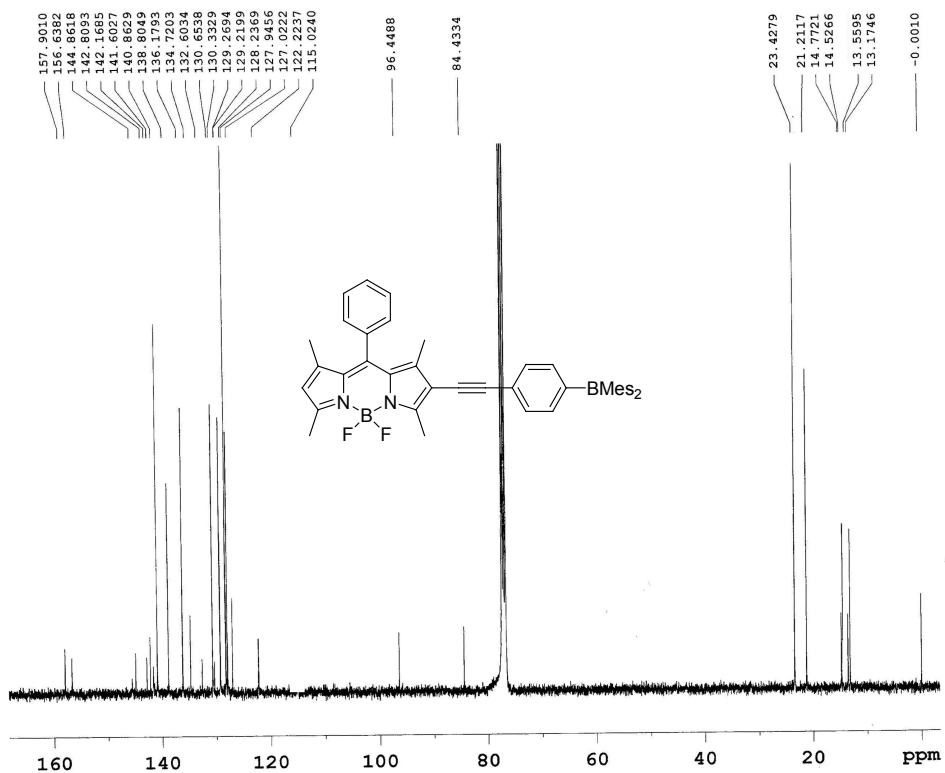



$^1\text{H}$  NMR of **2** (300 MHz,  $\text{CDCl}_3$ )

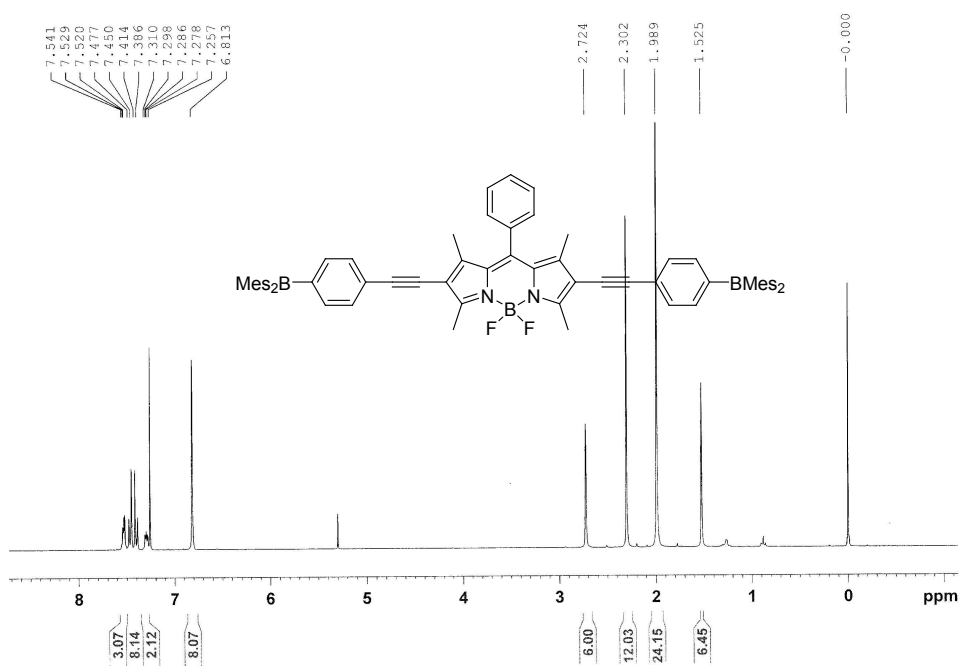

$^{13}\text{C}$  NMR of **2** (400 MHz,  $\text{CDCl}_3$ )

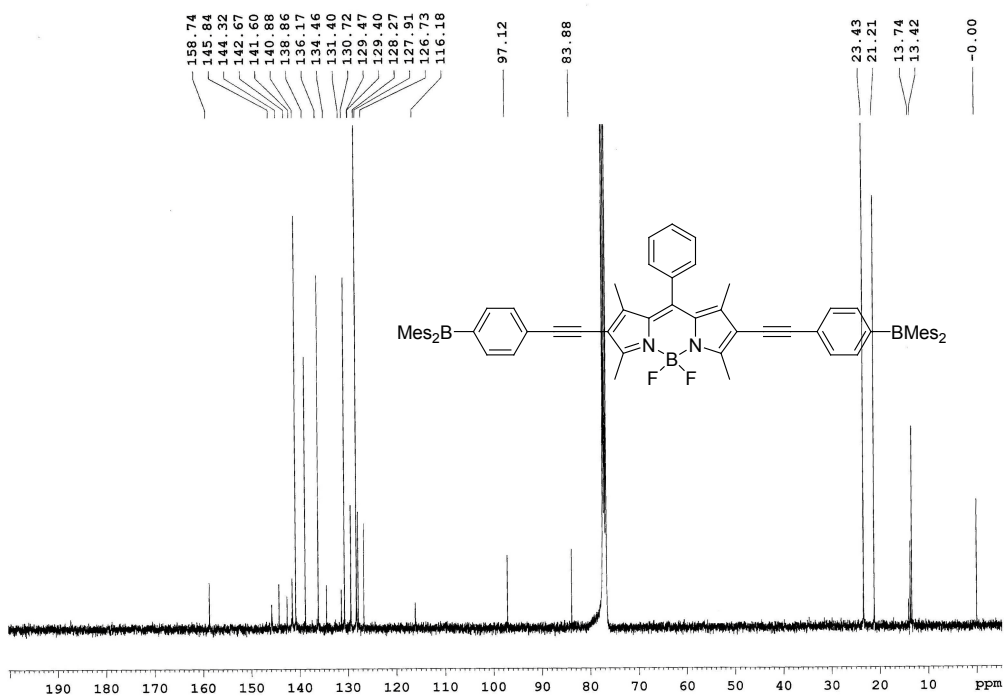

Supplement: c1ob05959a.pdf [file c1ob05959a.pdf]
